# Supplementary figures and images for: Coupling confocal fluorescence detection and recirculating microfluidic control for single particle analysis in discrete nanoliter volumes
Source: Royal Society of Chemistry journal article supplement (doi:10.1039/b717941c), 2008-01-01

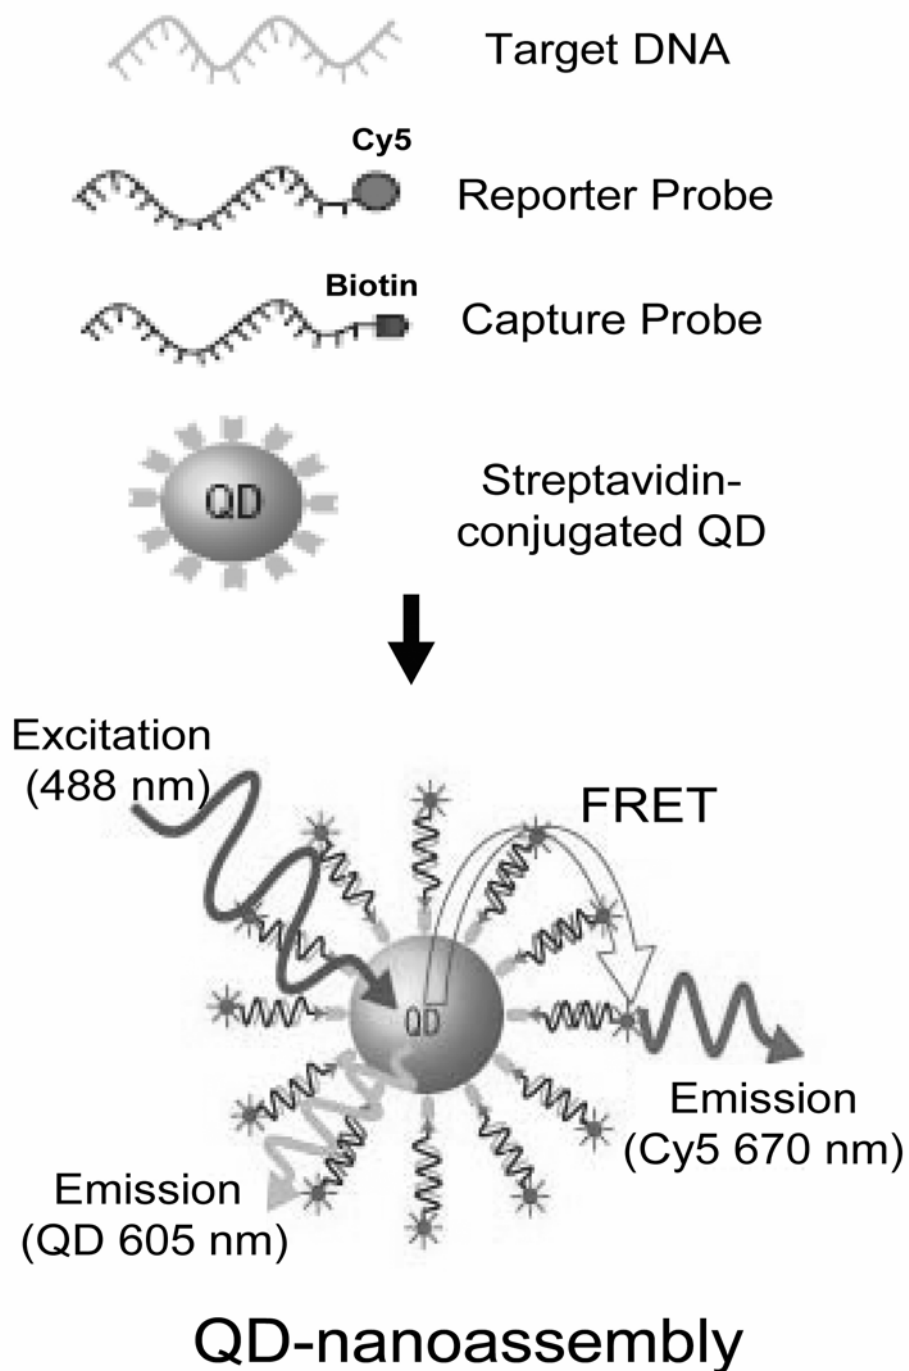

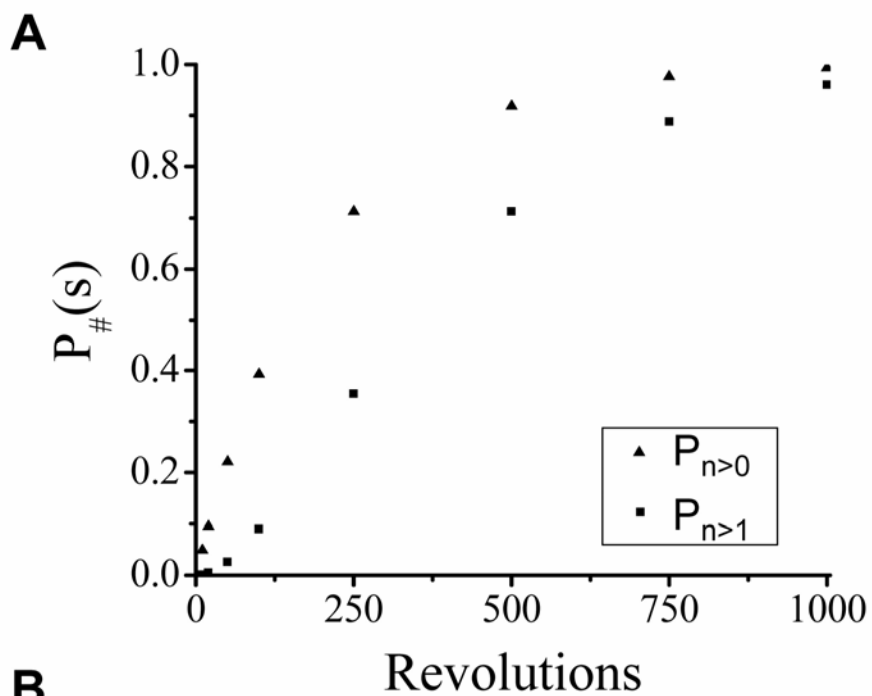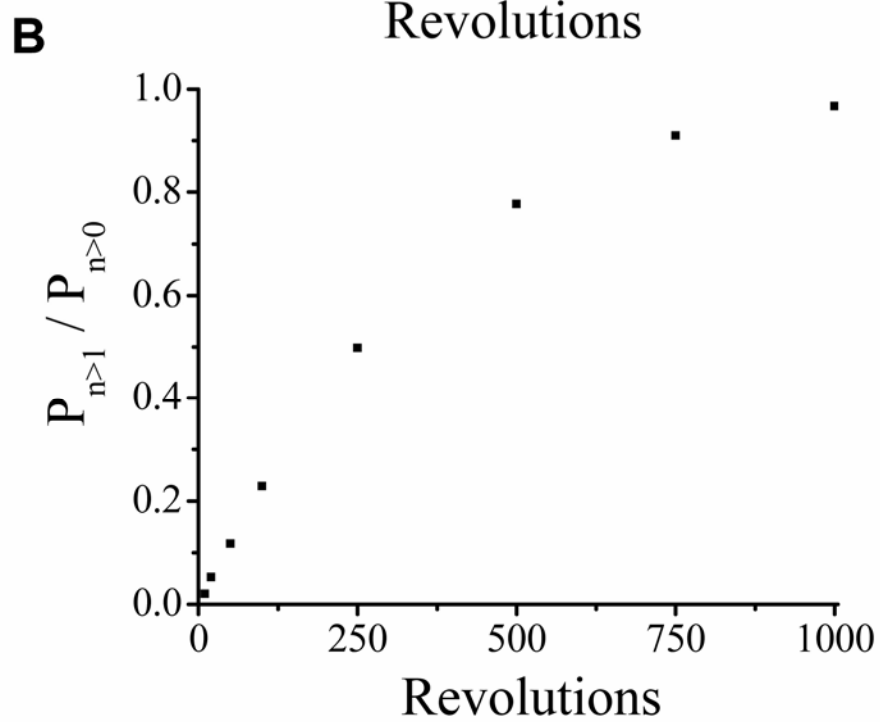

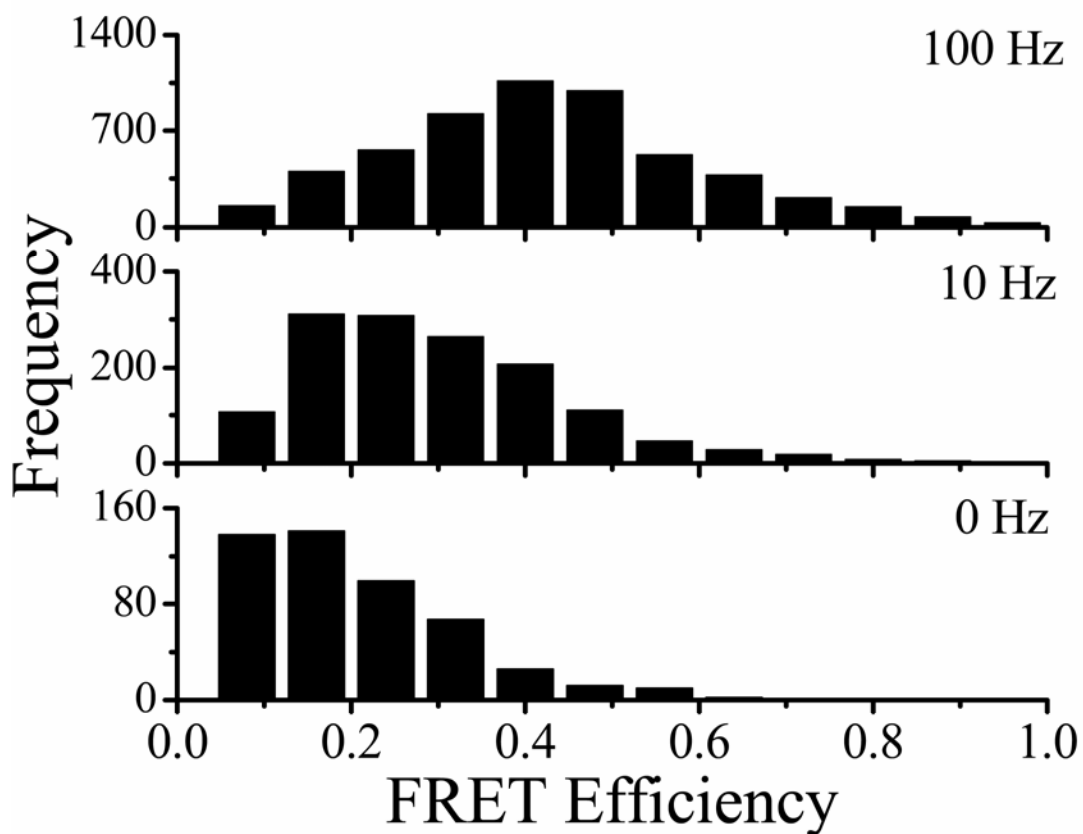

Supplement: b717941c-f.pdf [file b717941c-f.pdf]
